# Supplementary material
Source: PubMed Central journal article supplement (PMC2895139)
Supplement: 0914428107_pnas.200914428SI.pdf [file 0914428107_pnas.200914428SI.pdf]

# Supporting Information

Toledo-Ortiz et al. 10.1073/pnas.0914428107

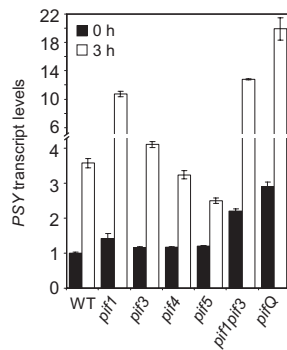

**Fig. S1.** *PSY* transcript levels in etiolated and deetioliating seedlings. RNA samples for qPCR analysis of *PSY* expression were collected from seedlings germinated and grown for 3 d in the dark (black columns) and illuminated with R light for 3 h (white columns). *PSY* transcript accumulation normalized to *APT* levels is expressed relative to that in WT seedlings before illumination. Data in the columns are mean  $\pm$  SD ( $n = 3$ ).

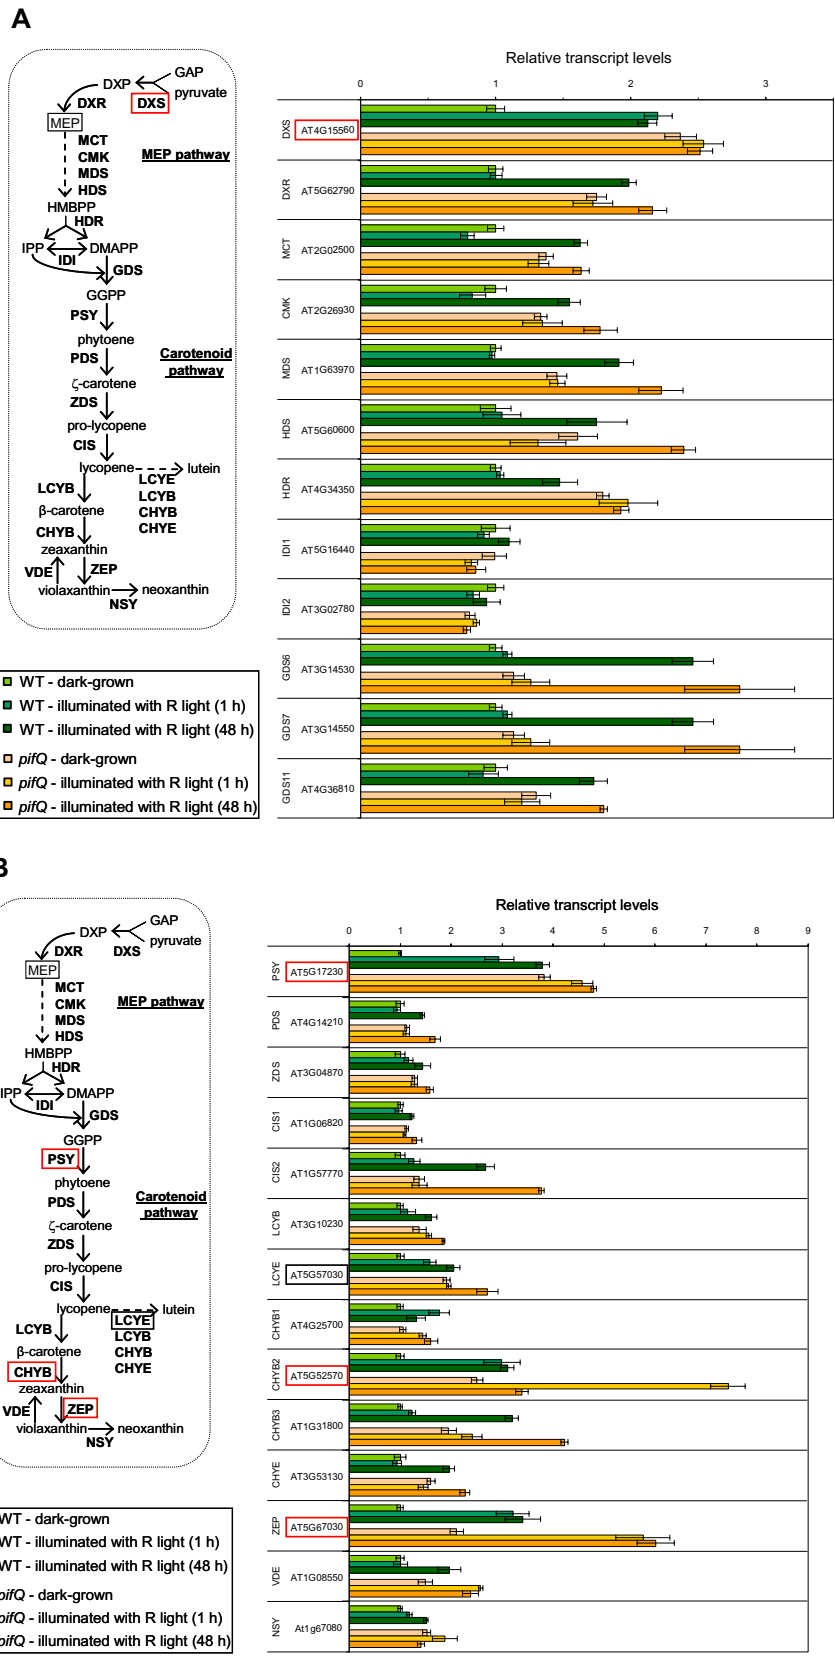

**Fig. S2.** Transcript levels of genes involved in plastidial isoprenoid and carotenoid biosynthesis in WT and *pifQ* seedlings. Expression data (mean and SE) from the experiments reported by Leivar et al. (1) are plotted relative to the levels in dark-grown WT seedlings. Red boxes denote potential PIF target genes according to these authors (class 7 genes), and black boxes denote genes with similar expression trends (i.e., higher expression in dark-grown mutant seedlings, rapid light up-regulation, and robust sustained expression under R light). The steps catalyzed by the enzymes encoded by the indicated genes (TAIR numbers)

Legend continued on following page

are shown in the cartoon on the left. In the case of geranylgeranyl diphosphate synthase (GDS), only isoforms induced by light are included. (A) Genes involved in the production of carotenoid precursors in plastids. (B) Genes specific to the carotenoid pathway.

1. Leivar P, et al. (2009) Definition of early transcriptional circuitry involved in light-induced reversal of PIF-imposed repression of photomorphogenesis in young *Arabidopsis* seedlings. *Plant Cell* 21:3535–3553.

**Table S1. Oligos used for the experiments**

|             |                                        |
|-------------|----------------------------------------|
| <b>QPCR</b> |                                        |
| qPSY F      | GACACCCGAAAGGCGAAAGG                   |
| qPSY R      | CAGCGAGAGCAGCATCAAGC                   |
| qGAI F      | GCTTATGCAGGCTCTTGCG                    |
| qGAI R      | AACCGGAAAAACAGGAGGACC                  |
| QPORC F     | GGGCAAAACAGTTCAATGA                    |
| QPORC R     | GGAAAAAGAAGCCGAAACAG                   |
| qAPT F      | GTTGCAGGTGTTGAAGCTAGAGGT               |
| qAPT R      | TGGCACGAATAGCCAACGCAATAG               |
| <b>EMSA</b> |                                        |
| G-box I F   | CCATTGGCCGTAGGCTCCACGTGGCATCTCTGATCT   |
| G-box I R   | AGATCAGAGAGATGCCACGTGGAGCCTACGGCCAATGG |
| G-mut I F   | CCATTGGCCGTAGGCTCCTTTTGCATCTCTGATCT    |
| G-mut I R   | AGATCAGAGAGATGCCAAAAAGAGCCTACGGCCAATGG |
| G-box II F  | TACCAATGAAACATTGACACGTGGAAAAGCAACGTCGC |
| G-box II R  | GCGACGTTGCTTTTCCACGTGTCAATGTTTCATTGGTA |
| <b>ChIP</b> |                                        |
| PSY(G+) F   | TGGGACCCAAATACCGACTA                   |
| PSY(G+) R   | cgaggggttgctagaaaact                   |
| PSY(G-) F   | ttacgtggctgactctgtacg                  |
| PSY(G-) R   | ttaattataatctttgccactg                 |
| CHYB2 F     | tttgaaaatgcatggaacaa                   |
| CHYB2 R     | tggagagagggccacatttt                   |
| PORC F      | gggcaaaaacagttcaatga                   |
| PORC R      | ggaaaaagaagccgaaacag                   |
| UBQ10 F     | TTCGTGGTGGTTTCTAAATC                   |
| UBQ10 R     | GGAAAAAGAAGCCGAAAGCG                   |
